# Supplementary material for: Phenolic Compounds from Humulus lupulus as Natural Antimicrobial Products: New Weapons in the Fight against Methicillin Resistant Staphylococcus aureus, Leishmania mexicana and Trypanosoma brucei Strains
Source: PubMed Central journal article supplement (PMC6472001; doi:10.3390/molecules24061024), 2019-03-14

## Supplementary material

**Table S1.** Linearity and sensitivity of the quantification method by UPLC-UV for xanthohumol, humulone and lupulone

| <b>Products</b>         | <b>LOD<br/>(ng/mL)</b> | <b>LOQ<br/>(ng/mL)</b> | <b>Linearity range</b>                          | <b>Slope<br/>(a)</b> | <b>Intercept<br/>(b)</b> | <b>R<sup>2</sup></b> |
|-------------------------|------------------------|------------------------|-------------------------------------------------|----------------------|--------------------------|----------------------|
| Xanthohumol<br>(370 nm) | 2.5                    | 10                     | 10 ng.mL <sup>-1</sup> -10 µg.mL <sup>-1</sup>  | 41129.8              | 159.4                    | 0,997                |
| Humulone<br>(330 nm)    | 10                     | 25                     | 25 ng.mL <sup>-1</sup> -100 µg.mL <sup>-1</sup> | 7319.2               | 41.4                     | 0,998                |
| Lupulone<br>(330 nm)    | 10                     | 100                    | 25 ng.mL <sup>-1</sup> -10 µg.mL <sup>-1</sup>  | 9747.2               | 46.8                     | 0,998                |

**Table S2.**  $^1\text{H}$  and  $^{13}\text{C}$  NMR data for xanthohumol and desmethylxanthohumol in MeOD<sup>a</sup>

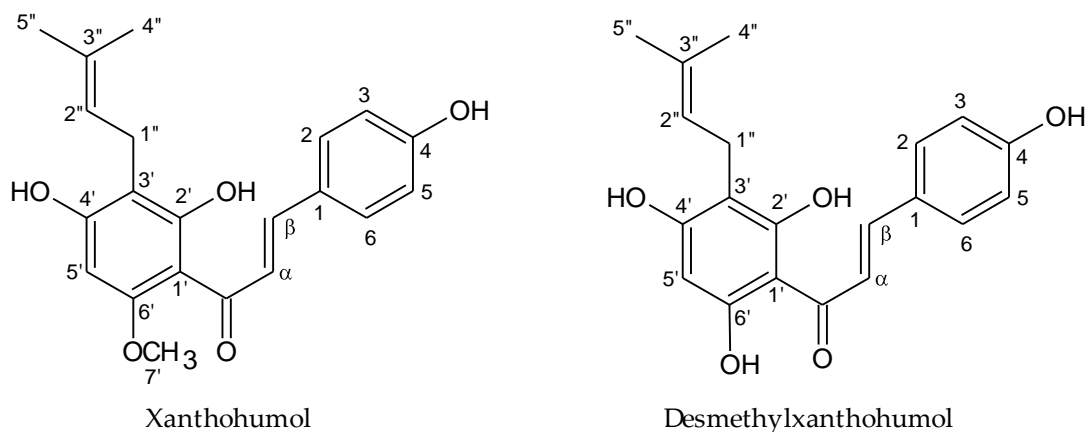

| Chalcones        |                                  |                          |                                   |                          |
|------------------|----------------------------------|--------------------------|-----------------------------------|--------------------------|
| Position         | XN                               |                          | DMX                               |                          |
|                  | $\delta$ $^1\text{H}$            | $\delta$ $^{13}\text{C}$ | $\delta$ $^1\text{H}$             | $\delta$ $^{13}\text{C}$ |
| 1                |                                  | 127                      |                                   | 127.2                    |
| 2                | 7.50 ( <i>d</i> , $J = 8.6$ Hz)  | 129.9                    | 7.48 ( <i>d</i> , $J = 8.7$ Hz)   | 129.8                    |
| 3                | 6.82 ( <i>d</i> , $J = 8.6$ Hz)  | 114.8                    | 6.81 ( <i>d</i> , $J = 8.7$ Hz)   | 115.4                    |
| 4                |                                  | 159.5                    |                                   | 159.5                    |
| 5                | 6.82 ( <i>d</i> , $J = 8.6$ Hz)  | 114.8                    | 6.81 ( <i>d</i> , $J = 8.7$ Hz)   | 115.4                    |
| 6                | 7.50 ( <i>d</i> , $J = 8.6$ Hz)  | 129.9                    | 7.48 ( <i>d</i> , $J = 8.7$ Hz)   | 129.8                    |
| 1'               |                                  | 104.2                    |                                   | 104.5                    |
| 2'               |                                  | 161.3                    |                                   | 164.2                    |
| 3'               |                                  | 107.9                    |                                   | 106.9                    |
| 4'               |                                  | 162.2                    |                                   | 162.4                    |
| 5'               | 6.02                             | 89.3                     | 5.93                              | 93.8                     |
| 6'               |                                  | 160.3                    |                                   | 159.7                    |
| OCH <sub>3</sub> | 3.90 ( <i>s</i> )                | 54.4                     | -                                 | -                        |
| 1''              | 3.25 ( <i>d</i> , $J = 7.3$ Hz)  | 20.5                     | 3.20 ( <i>d</i> , $J = 7.3$ Hz)   | 20.8                     |
| 2''              | 5.20 ( <i>t</i> , $J = 7.3$ Hz)  | 122.8                    | 5.19 ( <i>t</i> , $J = 7.3$ Hz)   | 123.2                    |
| 3''              |                                  | 129.9                    |                                   | 129.7                    |
| 4''              | 1.65 ( <i>s</i> )                | 24.3                     | 1.65 ( <i>s</i> )                 | 24.6                     |
| 5''              | 1.76 ( <i>s</i> )                | 16.1                     | 1.75 ( <i>s</i> )                 | 16.4                     |
| $\alpha$         | 7.80 ( <i>d</i> , $J = 15.4$ Hz) | 124                      | 8.07 ( <i>d</i> , $J = 15.64$ Hz) | 124.6                    |
| $\beta$          | 7.67 ( <i>d</i> , $J = 15.4$ Hz) | 142                      | 7.68 ( <i>d</i> , $J = 15.64$ Hz) | 141.7                    |
| CO               |                                  | 192.5                    |                                   | 192.8                    |

Assignments were also established by COSY, HSQC-DEPT, HMBC

<sup>a</sup> 500 MHz, chemical shifts in ppm relative to TMS, <sup>3</sup>  $J$  in Hz; *s*: singlet, *d*: doublet, *t*: triplet

**Table S3.**  $^1\text{H}$  and  $^{13}\text{C}$  NMR data for humulone and cohumulone in  $\text{CDCl}_3^a$

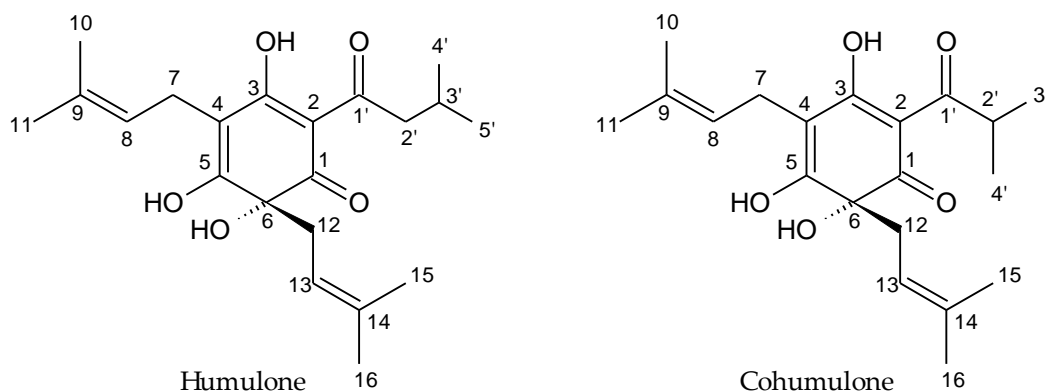

| $\alpha$ -acids |                                                                                    |                          |                                                                                    |                          |
|-----------------|------------------------------------------------------------------------------------|--------------------------|------------------------------------------------------------------------------------|--------------------------|
| Position        | Humulone                                                                           |                          | Cohumulone                                                                         |                          |
|                 | $\delta$ $^1\text{H}$                                                              | $\delta$ $^{13}\text{C}$ | $\delta$ $^1\text{H}$                                                              | $\delta$ $^{13}\text{C}$ |
| 1               |                                                                                    | 195.1                    |                                                                                    | 195.2                    |
| 2               |                                                                                    | 109.3                    |                                                                                    | 109.9                    |
| 3               |                                                                                    | 191.0                    |                                                                                    | 191.1                    |
| 4               |                                                                                    | 109.4                    |                                                                                    | 109.1                    |
| 5               |                                                                                    | 167.7                    |                                                                                    | 167.7                    |
| 6               |                                                                                    | 78.8                     |                                                                                    | 79.1                     |
| 7               | 3.03 ( <i>dd</i> , $J = 7.4$ ; 14.2 Hz)<br>3.10 ( <i>dd</i> , $J = 7.4$ ; 14.2 Hz) | 21.1                     | 3.02 ( <i>dd</i> , $J = 7.4$ ; 14.2 Hz)<br>3.10 ( <i>dd</i> , $J = 7.4$ ; 14.2 Hz) | 20.6                     |
| 8               | 5.12 ( <i>t</i> , $J = 7.2$ ; 7.2 Hz)                                              | 121.3                    | 5.12 ( <i>t</i> , $J = 7.2$ ; 7.2 Hz)                                              | 120.9                    |
| 9               |                                                                                    | 132.6                    |                                                                                    | 132.8                    |
| 10              | 1.69 ( <i>s</i> )                                                                  | 26.0                     | 1.69 ( <i>s</i> )                                                                  | 26.3                     |
| 11              | 1.75 ( <i>s</i> )                                                                  | 17.7                     | 1.73 ( <i>s</i> )                                                                  | 17.4                     |
| 12              | 2.43 ( <i>dd</i> , $J = 7.8$ ; 14.0 Hz)<br>2.54 ( <i>dd</i> , $J = 7.8$ ; 14.0 Hz) | 42.6                     | 2.43 ( <i>dd</i> , $J = 7.8$ ; 14.0 Hz)<br>2.56 ( <i>dd</i> , $J = 7.8$ ; 14.0 Hz) | 42.5                     |
| 13              | 5.00 ( <i>t</i> , $J = 7.9$ ; 7.9 Hz)                                              | 115.7                    | 5.02 ( <i>t</i> , $J = 7.8$ ; 7.8 Hz)                                              | 115.7                    |
| 14              |                                                                                    | 138.2                    |                                                                                    | 138.5                    |
| 15              | 1.68 ( <i>s</i> )                                                                  | 25.7                     | 1.68 ( <i>s</i> )                                                                  | 25.7                     |
| 16              | 1.52 ( <i>s</i> )                                                                  | 17.8                     | 1.52 ( <i>s</i> )                                                                  | 17.6                     |
| 1'              |                                                                                    | 200.4                    |                                                                                    | 204.9                    |
| 2'              | 2.77 ( <i>q</i> , $J = 6.7$ ; 14.0 Hz)                                             | 46.2                     | 3.72 ( <i>m</i> )                                                                  | 34.4                     |
| 3'              | 2.17 ( <i>m</i> )                                                                  | 26.4                     | 1.19 ( <i>d</i> , $J = 6.8$ Hz)                                                    | 18.9                     |
| 4'              | 1.00 ( <i>d</i> , $J = 6.7$ Hz)                                                    | 22.8                     | 1.12 ( <i>d</i> , $J = 6.8$ Hz)                                                    | 18.1                     |
| 5'              | 0.96 ( <i>d</i> , $J = 6.7$ Hz)                                                    | 22.5                     |                                                                                    |                          |

Assignments were also established by COSY, HSQC-DEPT, HMBC

<sup>a</sup> 500 MHz, chemical shifts in ppm relative to TMS, <sup>3</sup>  $J$  in Hz; *s*: singlet, *d*: doublet, *dd*: dedoubled doublet, *q*: quadruplet, *t*: triplet, *m*: multiplet

**Table S4.**  $^1\text{H}$  and  $^{13}\text{C}$  NMR data for lupulone and colupulone in  $\text{CDCl}_3^a$

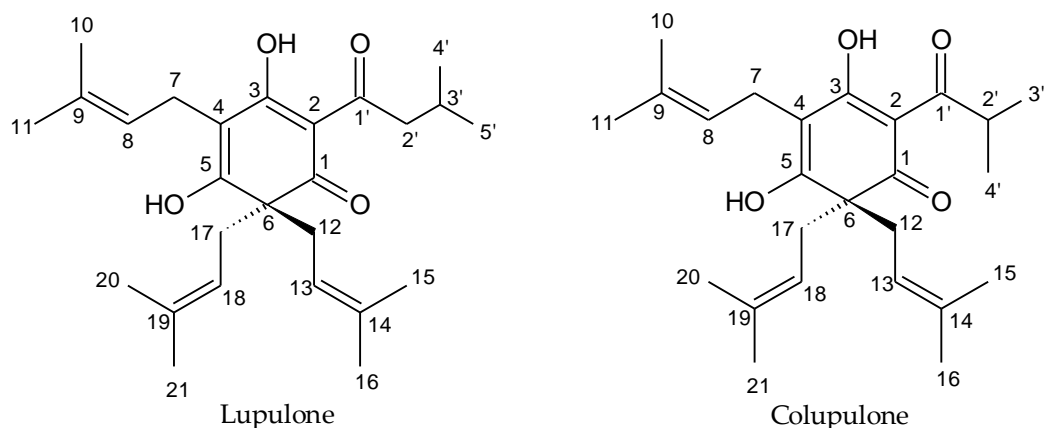

| $\beta$ -acids |                                                              |                          |                                                              |                          |  |
|----------------|--------------------------------------------------------------|--------------------------|--------------------------------------------------------------|--------------------------|--|
| Position       | Lupulone                                                     |                          | Colupulone                                                   |                          |  |
|                | $\delta$ $^1\text{H}$                                        | $\delta$ $^{13}\text{C}$ | $\delta$ $^1\text{H}$                                        | $\delta$ $^{13}\text{C}$ |  |
| 1              |                                                              | 196.1                    |                                                              | 195.5                    |  |
| 2              |                                                              | 108.8                    |                                                              | 110.1                    |  |
| 3              |                                                              | 190.4                    |                                                              | 190.5                    |  |
| 4              |                                                              | 110.1                    |                                                              | 109.9                    |  |
| 5              |                                                              | 172.8                    |                                                              | 172.9                    |  |
| 6              |                                                              | 57.0                     |                                                              | 57.3                     |  |
| 7              | 3.17 ( <i>q</i> , $J = 7.3 ; 14.2$ Hz)                       | 21.1                     | 3.17 ( <i>q</i> , $J = 7.3 ; 14.2$ Hz)                       | 20.7                     |  |
| 8              | 5.12 ( <i>t</i> , $J = 7.5 ; 7.0$ Hz)                        | 121.5                    | 5.12 ( <i>t</i> , $J = 7.5 ; 7.0$ Hz)                        | 121.1                    |  |
| 9              |                                                              | 137.8                    |                                                              | 137.4                    |  |
| 10             | 1.76 ( <i>s</i> )                                            | 25.7                     | 1.76 ( <i>s</i> )                                            | 25.3                     |  |
| 11             | 1.77 ( <i>s</i> )                                            | 18.7                     | 1.77 ( <i>s</i> )                                            | 17.3                     |  |
| 12             | 2.48 ( <i>dd</i> , $J = 7.8 ; 13.8$ Hz)<br>2.63 ( <i>m</i> ) | 37.9                     | 2.47 ( <i>dd</i> , $J = 7.8 ; 13.8$ Hz)<br>2.65 ( <i>m</i> ) | 37.2                     |  |
| 13             | 4.77 ( <i>t</i> , $J = 7.7 ; 7.7$ Hz)                        | 118.3                    | 4.79 ( <i>t</i> , $J = 7.7 ; 7.7$ Hz)                        | 118.4                    |  |
| 14             |                                                              | 135.1                    |                                                              | 135.1                    |  |
| 15             | 1.56 ( <i>s</i> )                                            | 25.8                     | 1.56 ( <i>s</i> )                                            | 25.3                     |  |
| 16             | 1.54 ( <i>s</i> )                                            | 17.8                     | 1.54 ( <i>s</i> )                                            | 17.3                     |  |
| 17             | 2.48 ( <i>dd</i> , $J = 7.8 ; 13.8$ Hz)<br>2.63 ( <i>m</i> ) | 37.9                     | 2.47 ( <i>dd</i> , $J = 7.8 ; 13.8$ Hz)<br>2.65 ( <i>m</i> ) | 36.8                     |  |
| 18             | 4.77 ( <i>t</i> , $J = 7.6 ; 7.6$ Hz)                        | 118.3                    | 4.79 ( <i>t</i> , $J = 7.6 ; 7.6$ Hz)                        | 117.9                    |  |
| 19             |                                                              | 135.1                    |                                                              | 135.1                    |  |
| 20             | 1.56 ( <i>s</i> )                                            | 25.8                     | 1.56 ( <i>s</i> )                                            | 25.3                     |  |
| 21             | 1.54 ( <i>s</i> )                                            | 17.8                     | 1.54 ( <i>s</i> )                                            | 17.3                     |  |
| 1'             |                                                              | 202.2                    |                                                              | 207.3                    |  |
| 2'             | 2.89 ( <i>m</i> )                                            | 48.1                     | 4 ( <i>m</i> )                                               | 35                       |  |
| 3'             | 2.1 ( <i>m</i> )                                             | 26.1                     | 1.10 ( <i>d</i> , $J = 6.8$ Hz)                              | 18.1                     |  |
| 4'             | 0.94 ( <i>d</i> , $J = 6.5$ Hz)                              | 22.8                     | 1.10 ( <i>d</i> , $J = 6.8$ Hz)                              | 18.1                     |  |
| 5'             | 0.93 ( <i>d</i> , $J = 6.5$ Hz)                              | 22.8                     | -                                                            | -                        |  |

Assignments were also established by COSY, HSQC-DEPT, HMBC

<sup>a</sup> 500 MHz, chemical shifts in ppm relative to TMS, <sup>3</sup>  $J$  in Hz; *s*: singlet, *d*: doublet, *dd*: dedoubled doublet, *t*: triplet, *q*: quadruplet, *m*: multiplet

**Figure S1.** Chromatograms at 370 nm of the crude hydro-ethanolic extract of cones and purified chalcones (desmethyloxanthohumol and xanthohumol)

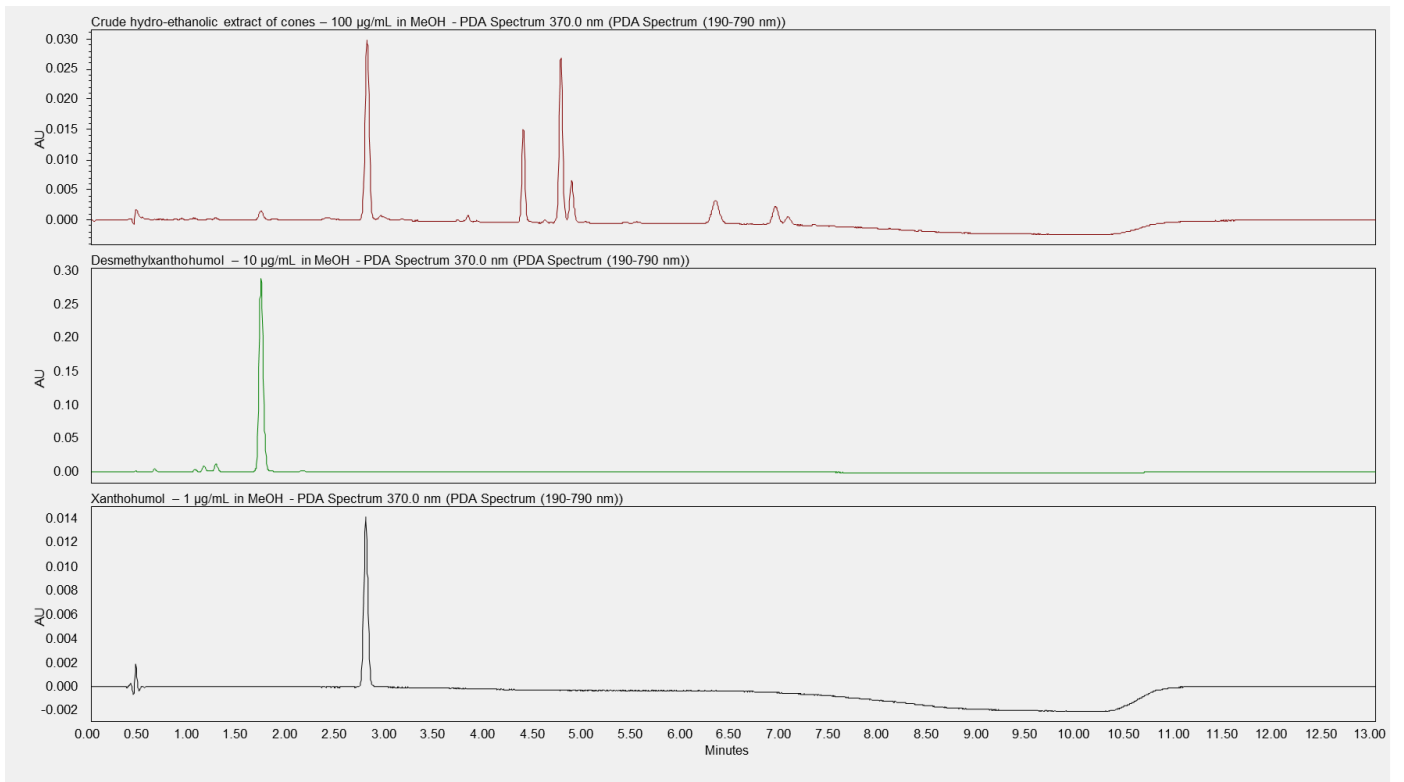

**Figure S2.** Chromatograms at 330 nm of the crude hydro-ethanolic extract of cones and purified acylphloroglucinol derivatives (cohumulone, humulone, colupulone and lupulone)

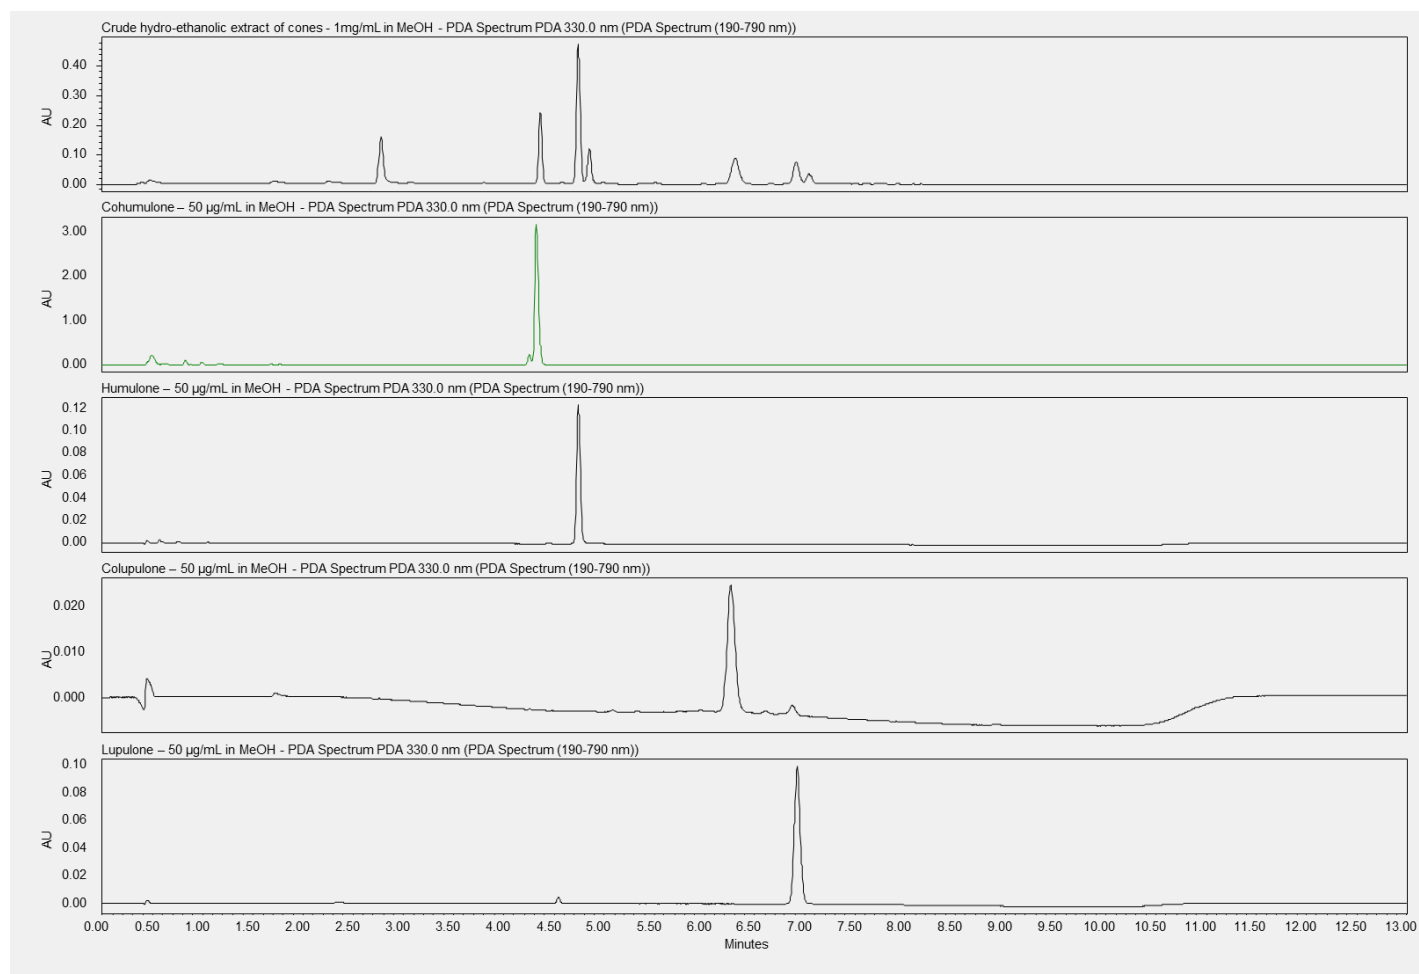

**Figure S3.** Total ion chromatogram of the crude hydro-ethanolic extract of cones in negative mode and selected ion recording of purified chalcones (desmethylxanthohumol and xanthohumol) and acylphloroglucinol derivatives (cohumulone, humulone, colupulone and lupulone)

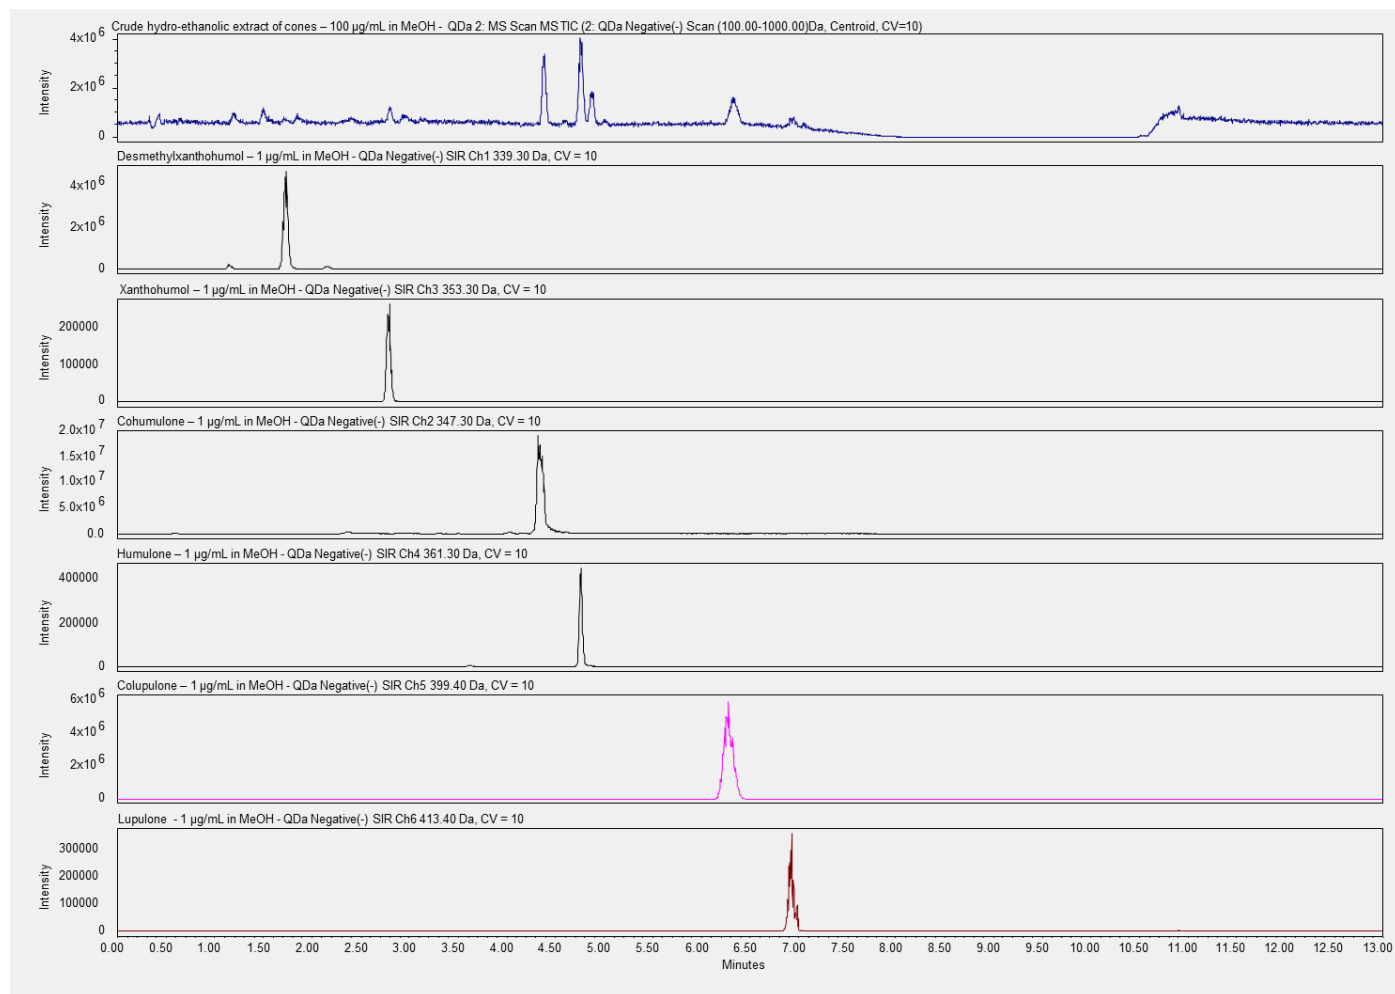

Supplement: molecules-24-01024-s001.pdf [file molecules-24-01024-s001.pdf]
